# Supplementary material
Source: publisher figshare collection journal article supplement (https://rs.figshare.com/ndownloader/files/10319319)
Supplement: Supplementary file 1 [file 10319319]

## Sheet: 3 vs 1 winnowed
trial	jh	logjh	social rank	eggs	@1or3	weight
27.0	10.54	1.06221		3	1	0.117
26.0	10.2	1.04922		3	1	0.102
28.0	9.48	1.02036		3	1	0.137
58.0	9.86	1.03583		7	1	0.1
59.0	8.53	0.979093		1	1	0.09
55.0	49.65	1.70458		4	1	0.111
57.0	6.95	0.900367		3	1	0.083
56.0	4.94	0.773786		1	1	0.125
52.0	41.16	1.6249		5	1	0.147
53.0	19	1.30103		4	1	0.103
54.0	12.58	1.1329		4	1	0.092
51.0	27.8	1.45939		4	1	0.094
49.0	27.65	1.45712			1	0.116
48.0	2.16	0.499687		0	1	0.128
46.0	43.1	1.64444		4	1	0.093
47.0	10.58	1.06371			1	0.121
45.0	5.73	0.828015		3	1	0.093
42.0	66.83	1.83142		7	1	0.095
44.0	4.74	0.758912		1	1	0.125
43.0	1.44	0.38739			1	0.1
38.0	31.5	1.51188		5	1	0.114
41.0	5.2	0.792392		2	1	0.108
37.0	2.96	0.597695		4	1	0.092
33.0	34	1.54407		3	1	0.105
36.0	4.2	0.716003		5	1	0.1
34.0	2.77	0.576341		3	1	0.12
31.0	60.8	1.79099		3	1	0.17
29.0	8.55	0.980003		7	1	0.101
32.0	2.45	0.537		3	1	0.116
9.0	44.66	1.65954			1	0.1
10.0	20.84	1.33925			1	0.104
8.0	11.14	1.08422			1	0.095
7.0	22.36	1.36847	1	6	3	0.115
7.0	11.56	1.09899	2	4	3	0.095
7.0	0	0	3	5	3	0.109
60.0	8.79	0.990783	1	3	3	0.114
60.0	5.19	0.791691	2	4	3	0.091
60.0	2.7	0.568202	3	3	3	0.099
50.0	27.11	1.44886	1	2	3	0.124
50.0	2.75	0.574031	2		3	0.127
50.0	4.99	0.777427	3	5	3	0.087
40.0	30	1.49136	1	4	3	0.097
40.0	1.3	0.361728	2	4	3	0.095
40.0	0.54	0.187521	3	0	3	0.098
39.0	76.78	1.89087	1	4	3	0.086
39.0	6.6	0.880814	2	5	3	0.078
39.0	6.16	0.854913	3		3	0.136
35.0	66.47	1.82911	1		3	0.118
35.0	10.22	1.04999	2	0	3	0.095
35.0	0.6	0.20412	3	5	3	0.126
25.0	23.7	1.3927	1	5	3	0.09
25.0	15.7	1.22272	2	3	3	0.107
25.0	3	0.60206	3	5	3	0.125
24.0	128.53	2.11237	1	4	3	0.106
24.0	52.1	1.72509	2	1	3	0.131
24.0	0	0	3	5	3	0.133
23.0	144.82	2.16382	1	2	3	0.122
23.0	33.99	1.54394	2	3	3	0.103
23.0	6.56	0.878522	3	4	3	0.1
